# Supplementary material for: A study of asymmetrical mixed-valent Mo2–Mo2complexes in the class III regime
Source: Royal Society of Chemistry journal article supplement (doi:10.1039/c6dt04915j), 2017-01-01
Supplement: c6dt04915j1.pdf [file c6dt04915j1.pdf]

## Supporting Information

for

# Study of asymmetrical mixed-valent Mo<sub>2</sub>-Mo<sub>2</sub> complexes in the class III regime

Suman Mallick, Tao Cheng, Lu Chen, Miao Meng, Yu Yu Zhang and Chun Y. Liu\*

*Department of Chemistry, Jinan University, 601 Huang-Pu Avenue West, Guangzhou-510632, China. E-mail: tcylu@jnu.edu.cn*

### Contents of Supporting Information

**Fig. S1–S3** <sup>1</sup>H NMR spectra of compound [OO–OS], [SS–OO] and [SS–OS].

**Fig. S4** X-band EPR spectra of the asymmetric MV cations generated by single electron oxidation of the neutral compounds. Samples were measured in CH<sub>2</sub>Cl<sub>2</sub> solutions at 173 K.

**Table S1** Crystallographic data and collection parameters for [SS–OO]·4CH<sub>2</sub>Cl<sub>2</sub> and [SS–OS]·4CH<sub>2</sub>Cl<sub>2</sub>.

**Table S2** Spectroscopic data of neutral asymmetric complexes in comparison with symmetric analogues.

**Table S3** Selected DFT optimized bond lengths of [OO–OS]<sup>+</sup>, [SS–OO]<sup>+</sup>, [SS–OS]<sup>+</sup>.

**Table S4** Fragment composition (%) of the frontier molecular orbitals for the MV computational models ([OO–OS]<sup>+</sup>), ([SS–OO]<sup>+</sup>) and ([SS–OS]<sup>+</sup>).

**Table S5–S7** Cartesian coordinates (Å) for DFT energy-minimized neutral model compounds of [OO–OS]<sup>+</sup>, [SS–OO]<sup>+</sup> and [SS–OS]<sup>+</sup>.

**Table S8–S10** Cartesian coordinates for DFT energy-minimized oxidised model compounds ([OO–OS]<sup>+</sup>), ([SS–OO]<sup>+</sup>) and ([SS–OS]<sup>+</sup>).

Figures:

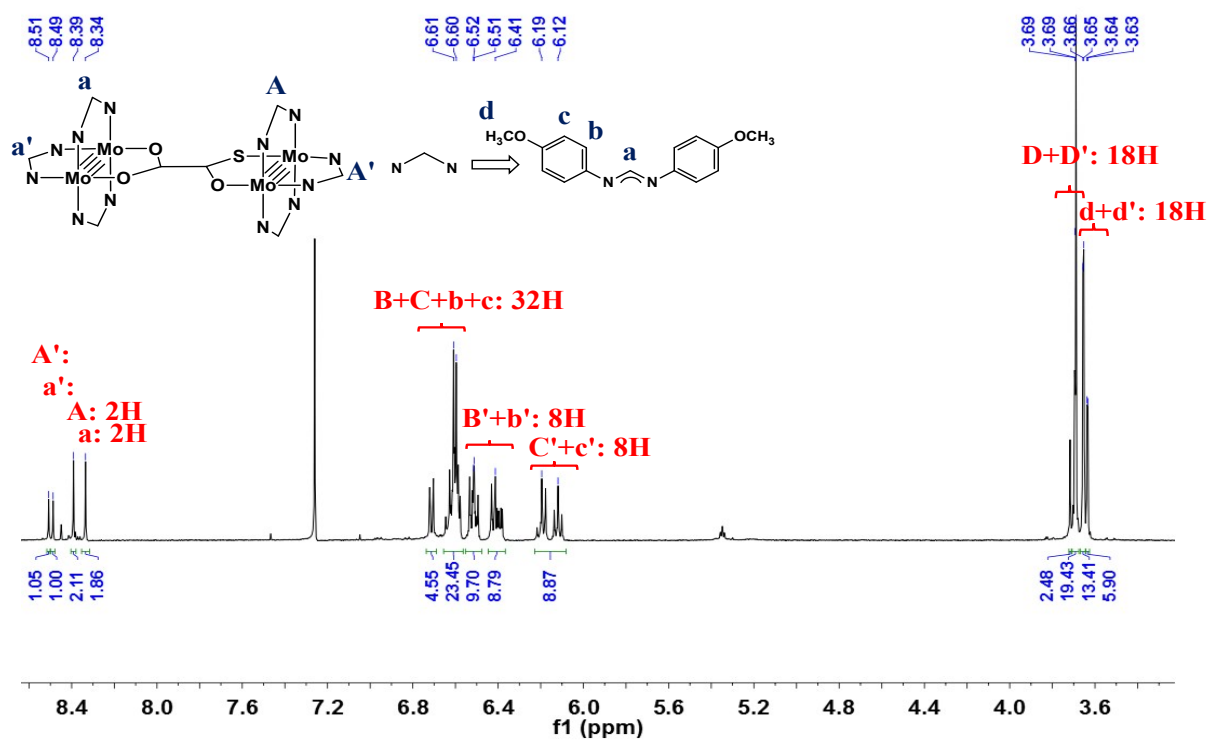

Fig.S1 <sup>1</sup>H NMR spectrum of compound [OO–OS].

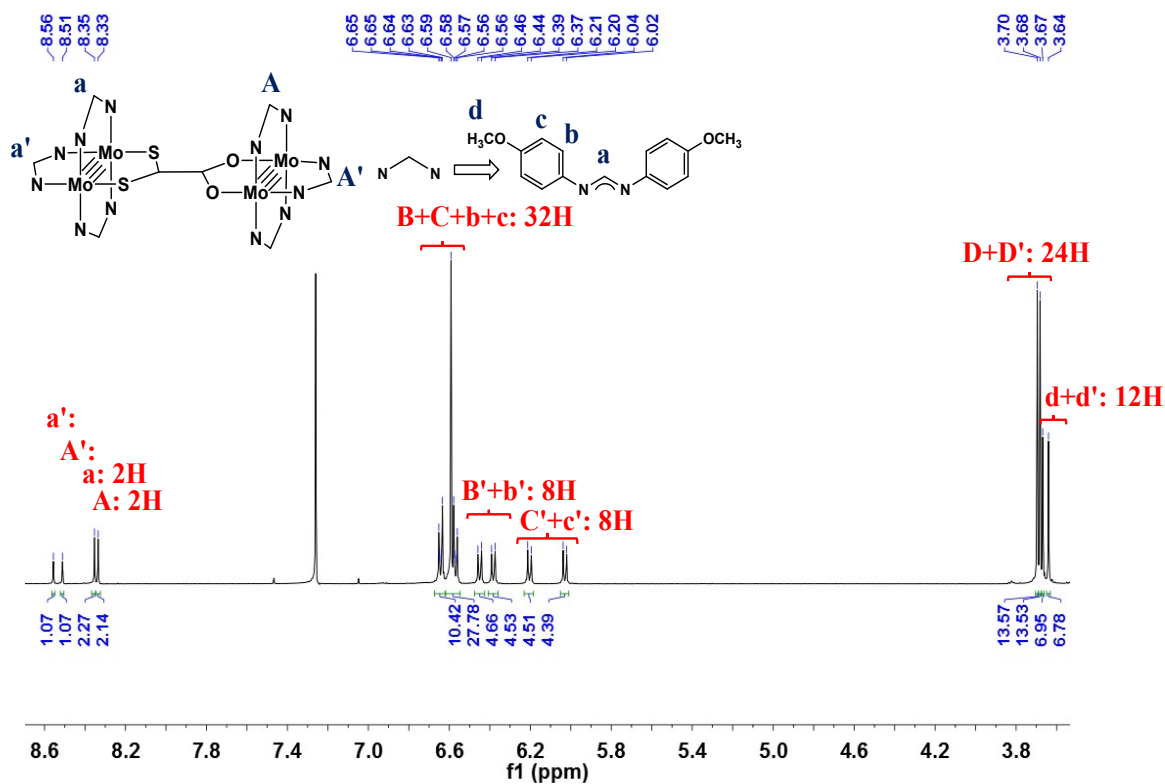

Fig.S2 <sup>1</sup>H NMR spectrum of compound [SS–OO].

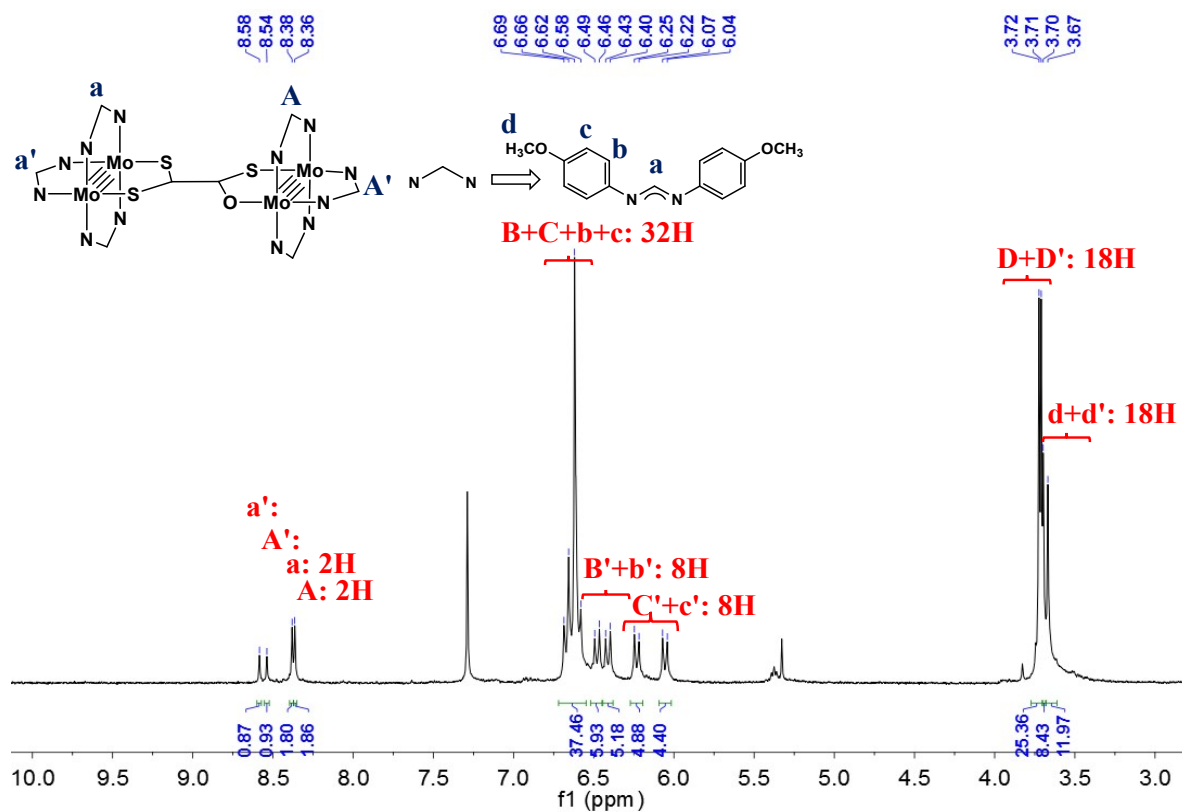

**Fig.S3** <sup>1</sup>H NMR spectrum of compound [SS-OS].

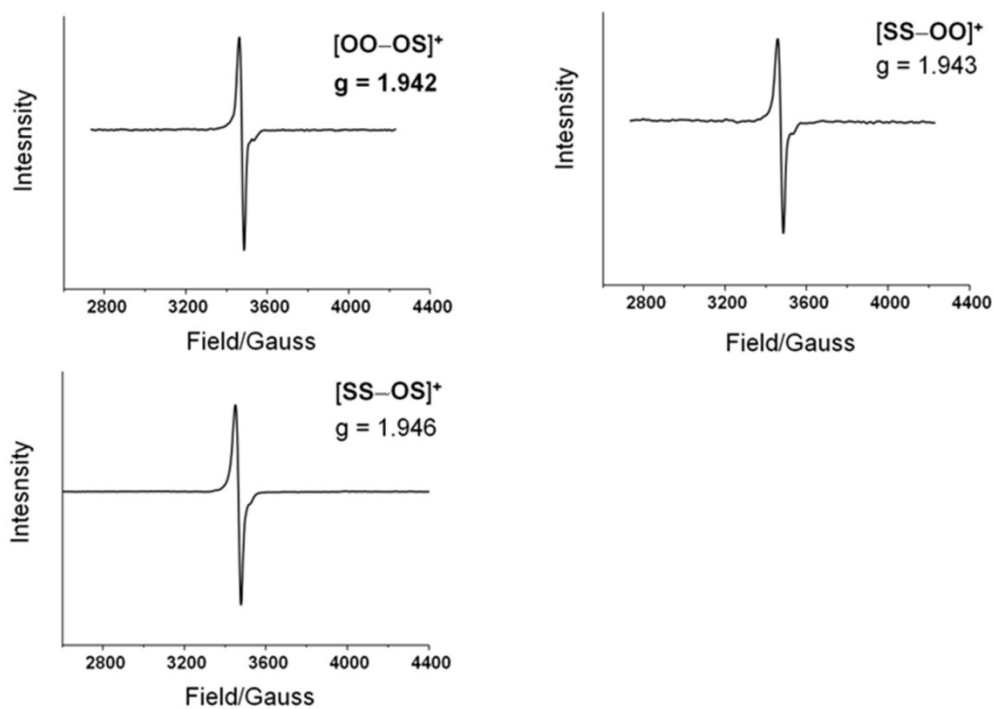

**Fig. S4** X-band EPR spectra of the asymmetric MV cations generated by single electron oxidation of the neutral compounds. Samples were measured in CH<sub>2</sub>Cl<sub>2</sub> solutions at 173 K.

**Tables:**

**Table S1** Crystallographic data and collection parameters for [SS–OO]·4CH<sub>2</sub>Cl<sub>2</sub> and [SS–OS]·4CH<sub>2</sub>Cl<sub>2</sub>.

| Compound                             | [SS–OO]·4CH <sub>2</sub> Cl <sub>2</sub>                                                                       | [SS–OS]·4CH <sub>2</sub> Cl <sub>2</sub>                                                                       |
|--------------------------------------|----------------------------------------------------------------------------------------------------------------|----------------------------------------------------------------------------------------------------------------|
| Formula                              | C <sub>96</sub> H <sub>98</sub> N <sub>12</sub> O <sub>14</sub> S <sub>2</sub> Cl <sub>8</sub> Mo <sub>4</sub> | C <sub>96</sub> H <sub>98</sub> N <sub>12</sub> O <sub>13</sub> S <sub>3</sub> Cl <sub>8</sub> Mo <sub>4</sub> |
| Fw                                   | 2375.34                                                                                                        | 2391.40                                                                                                        |
| Crystal system                       | Triclinic                                                                                                      | Triclinic                                                                                                      |
| Space group                          | <i>P</i> $\bar{1}$                                                                                             | <i>P</i> $\bar{1}$                                                                                             |
| <i>a</i> (Å)                         | 12.4057(6)                                                                                                     | 12.4214(5)                                                                                                     |
| <i>b</i> (Å)                         | 14.4700(6)                                                                                                     | 14.4786(7)                                                                                                     |
| <i>c</i> (Å)                         | 15.4898(7)                                                                                                     | 15.4651(7)                                                                                                     |
| $\alpha$ (deg)                       | 72.209(4)                                                                                                      | 72.182(4)                                                                                                      |
| $\beta$ (deg)                        | 83.612(4)                                                                                                      | 83.891(4)                                                                                                      |
| $\gamma$ (deg)                       | 71.215(4)                                                                                                      | 71.230(4)                                                                                                      |
| <i>V</i> (Å <sup>3</sup> )           | 2506.3(2)                                                                                                      | 2507.0(2)                                                                                                      |
| <i>Z</i>                             | 1                                                                                                              | 1                                                                                                              |
| <i>T</i> (K)                         | 173                                                                                                            | 173                                                                                                            |
| <i>R</i> <sub>1</sub> <sup>a</sup>   | 0.0520                                                                                                         | 0.0819                                                                                                         |
| w <i>R</i> <sub>2</sub> <sup>b</sup> | 0.1458                                                                                                         | 0.2324                                                                                                         |
| GOF on <i>F</i> <sup>2</sup>         | 1.054                                                                                                          | 1.067                                                                                                          |

$$^a R_1 = \frac{\sum ||F_o| - |F_c||}{\sum |F_o|}, \quad ^b wR_2 = \frac{[\sum [w(F_o^2 - F_c^2)^2]]}{\sum [w(F_o^2)^2]}^{1/2}$$

**Table S2** Spectroscopic data of the neutral asymmetric complexes in comparison with the symmetric analogues.

| Complex | $E_{\text{MLCT}}(\text{cm}^{-1})$ | $\epsilon_{\text{MLCT}}(\text{M}^{-1}\text{cm}^{-1})$ |
|---------|-----------------------------------|-------------------------------------------------------|
| [OO–OS] | 17240                             | 17985                                                 |
| [SS–OO] | 14730                             | 14502                                                 |
| [SS–OS] | 13700                             | 45893                                                 |
| [OO–OO] | 21740                             | 13025                                                 |
| [OS–OS] | 14640                             | 22275                                                 |
| [SS–SS] | 11240                             | 38025                                                 |

**Table S3** Selected DFT optimized bond lengths of [OO–OS]', [SS–OO]', [SS–OS]'.

| Bond length<br>(Å) | [OO–OS]' |       | [SS–OO]' |       | [SS–OS]' |       |
|--------------------|----------|-------|----------|-------|----------|-------|
|                    | OO       | OS    | OO       | SS    | OS       | SS    |
| Mo(1)–Mo(2)        | 2.154    | 2.158 | 2.153    | 2.160 | 2.159    | 2.161 |
| Mo(1)–N(1)         | 2.129    | 2.141 | 2.132    | 2.162 | 2.152    | 2.161 |
| Mo(1)–N(3)         | 2.130    | 2.151 | 2.131    | 2.163 | 2.141    | 2.162 |
| Mo(1)–N(5)         | 2.144    | 2.149 | 2.145    | 2.151 | 2.150    | 2.150 |
| Mo(2)–N(2)         | 2.144    | 2.144 | 2.144    | 2.151 | 2.144    | 2.150 |
| Mo(1)–O(1)         | 2.129    | —     | 2.126    | —     | 2.078    | —     |
| Mo(2)–O(2)         | 2.133    | 2.086 | 2.124    | —     | —        | —     |
| Mo(1)–S(1)         | —        | 2.489 | —        | 2.456 | 2.484    | 2.454 |
| Mo(2)–S(2)         | —        | —     | —        | 2.454 | —        | 2.455 |
| C(1)–C(2)          | 1.498    |       | 1.486    |       | 1.474    |       |

**Table S4** Fragment composition (%) of the frontier molecular orbitals for the MV computational models ([**OO-OS**]<sup>+</sup>), ([**SS-OO**]<sup>+</sup>) and ([**SS-OS**]<sup>+</sup>).

| Orbital | ([ <b>OO-OS</b> ] <sup>+</sup> ) |      |                 |      | ([ <b>SS-OO</b> ] <sup>+</sup> ) |      |                 |      | ([ <b>SS-OS</b> ] <sup>+</sup> ) |      |                 |      |
|---------|----------------------------------|------|-----------------|------|----------------------------------|------|-----------------|------|----------------------------------|------|-----------------|------|
|         | Mo <sub>2</sub>                  | COS  | Mo <sub>2</sub> | COO  | Mo <sub>2</sub>                  | COO  | Mo <sub>2</sub> | CSS  | Mo <sub>2</sub>                  | COS  | Mo <sub>2</sub> | CSS  |
| HOMO-1  | 21.2                             | 6.8  | 42.5            | 12.1 | 45.1                             | 15.7 | 16.1            | 7.9  | 35.5                             | 16.2 | 30.0            | 11.2 |
| SOMO    | 49.2                             | 4.4  | 26.3            | 2.6  | 20.8                             | 1.9  | 55.9            | 3.1  | 37.4                             | 4.5  | 38.5            | 4.8  |
| LUMO    | 4.8                              | 28.1 | 10.5            | 46.8 | 13.1                             | 48.2 | 5.2             | 18.2 | 12.4                             | 34.5 | 9.8             | 26.5 |

**Table S5** Cartesian coordinates (Å) for DFT energy-minimized model compounds of [**OO-OS**]<sup>+</sup>.

| Atoms | x         | y         | z         |
|-------|-----------|-----------|-----------|
| Mo    | -0.639285 | 1.988224  | 3.344599  |
| Mo    | -1.620646 | 0.083369  | 3.089346  |
| H     | -1.406141 | 3.087237  | 5.918397  |
| C     | -0.062851 | 0.357409  | 0.529411  |
| N     | -2.274933 | 3.035144  | 2.424195  |
| N     | -3.306365 | 0.999197  | 2.129515  |
| N     | -1.524977 | 2.291565  | 5.280923  |
| N     | -2.567490 | 0.259302  | 5.001005  |
| N     | 1.067106  | 1.064691  | 4.272459  |
| N     | 0.030136  | -0.966756 | 3.966822  |
| C     | -3.301046 | 2.323081  | 1.957540  |
| H     | -4.134466 | 2.822666  | 1.424644  |
| C     | -2.337484 | 1.341683  | 5.746338  |
| H     | -2.816343 | 1.447863  | 6.739289  |
| C     | 1.085859  | -0.263434 | 4.383936  |
| H     | 1.970708  | -0.778943 | 4.807260  |
| H     | -2.338377 | 4.038737  | 2.218558  |
| H     | 0.373315  | 2.087044  | -4.455611 |
| H     | 0.142850  | -1.982490 | 4.063710  |
| H     | 3.940061  | -3.010583 | -1.386523 |
| H     | 1.879678  | -3.953995 | -1.833772 |
| H     | 2.322968  | -2.245658 | -6.830501 |
| H     | 0.741351  | -3.412159 | -5.613848 |
| H     | -4.115743 | 0.528573  | 1.709077  |
| O     | -0.141451 | -1.193402 | -1.295900 |
| O     | 1.259051  | 0.573545  | -1.472925 |
| C     | 0.379144  | -0.111265 | -0.822941 |
| Mo    | 0.508173  | -1.829578 | -3.225564 |
| Mo    | 1.847499  | -0.150546 | -3.386506 |
| N     | 1.992832  | -3.015273 | -2.232796 |
| N     | 3.423441  | -1.219425 | -2.402384 |
| N     | 1.081299  | -2.568150 | -5.138678 |

|   |           |           |           |
|---|-----------|-----------|-----------|
| N | 2.515514  | -0.775519 | -5.310482 |
| N | -1.119110 | -0.705404 | -4.051663 |
| N | 0.312880  | 1.088408  | -4.225875 |
| C | 3.175719  | -2.456518 | -1.966426 |
| H | 1.929953  | 1.520696  | 4.589852  |
| C | 1.997931  | -1.889827 | -5.834497 |
| C | -0.912422 | 0.577045  | -4.361188 |
| H | -1.748153 | 1.209737  | -4.718902 |
| S | 0.514483  | 1.877527  | 1.142411  |
| O | -0.870252 | -0.385330 | 1.200348  |
| H | 4.343342  | -0.859205 | -2.124306 |
| H | -2.094340 | -1.005753 | -4.162411 |
| H | -3.202780 | -0.419390 | 5.436535  |
| H | 3.211864  | -0.319337 | -5.911571 |

**Table S6** Cartesian coordinates (Å) for DFT energy-minimized model compounds of [SS-OO]'.

| <b>Atoms</b> | <b>x</b>  | <b>y</b>  | <b>z</b>  |
|--------------|-----------|-----------|-----------|
| Mo           | -0.762964 | 1.891941  | 3.380558  |
| Mo           | -1.959645 | 0.103706  | 3.443518  |
| H            | -2.017300 | -1.228547 | -4.451165 |
| C            | -0.408660 | 0.271631  | 0.928688  |
| N            | -2.309716 | 2.979622  | 2.368401  |
| N            | -3.589312 | 1.066901  | 2.437776  |
| N            | -1.466471 | 2.521051  | 5.291052  |
| N            | -2.747811 | 0.608780  | 5.359363  |
| N            | 0.924194  | 0.887039  | 4.238141  |
| N            | -0.354935 | -1.025530 | 4.307952  |
| C            | -3.431333 | 2.332507  | 2.044388  |
| H            | -4.219320 | 2.837534  | 1.451143  |
| C            | -2.347018 | 1.747329  | 5.931591  |
| H            | -2.738574 | 2.045415  | 6.922747  |
| C            | 0.816313  | -0.416475 | 4.505001  |
| H            | 1.689715  | -0.986284 | 4.878711  |
| H            | -2.260222 | 3.933856  | 1.994130  |
| H            | 0.207905  | 2.053031  | -4.572597 |
| H            | -4.465752 | 0.639457  | 2.117572  |
| H            | 4.165875  | -2.922207 | -1.727015 |
| H            | 1.866920  | 1.264593  | 4.387203  |
| H            | -1.217761 | 3.376025  | 5.802276  |
| H            | -3.426272 | 0.080307  | 5.920283  |
| H            | 2.491825  | -1.973963 | -6.916629 |
| H            | 4.371529  | -0.683615 | -2.258442 |
| H            | -0.338761 | -2.030945 | 4.513785  |
| H            | 0.980033  | -3.308045 | -5.792536 |
| S            | -0.479002 | -1.583162 | -1.112266 |
| S            | 1.223517  | 0.925339  | -1.197402 |
| C            | 0.095374  | -0.116122 | -0.414722 |
| Mo           | 0.568445  | -1.846097 | -3.316190 |
| Mo           | 1.780123  | -0.059114 | -3.377313 |
| N            | 2.172722  | -2.986826 | -2.449366 |
| N            | 3.462145  | -1.083675 | -2.515027 |
| N            | 1.245426  | -2.462874 | -5.274507 |
| N            | 2.540043  | -0.558794 | -5.340110 |

|   |           |           |           |
|---|-----------|-----------|-----------|
| N | -1.087211 | -0.843858 | -4.251287 |
| N | 0.202118  | 1.058924  | -4.318473 |
| C | 3.329340  | -2.372198 | -2.201150 |
| H | 2.147759  | -3.965801 | -2.143109 |
| C | 2.118714  | -1.685498 | -5.914158 |
| H | 3.212943  | -0.028382 | -5.904908 |
| C | -0.952114 | 0.442676  | -4.572765 |
| H | -1.794205 | 0.996252  | -5.032687 |
| O | 0.003060  | 1.373955  | 1.466350  |
| O | -1.252985 | -0.500459 | 1.533696  |

**Table S7** Cartesian coordinates (Å) for DFT energy-minimized model compounds of [SS-OS].

| Atoms | x         | y         | z         |
|-------|-----------|-----------|-----------|
| Mo    | -0.603714 | 1.931819  | 3.448082  |
| Mo    | -2.005071 | 0.294790  | 3.613265  |
| H     | -0.755086 | 3.501587  | 5.887728  |
| C     | -0.419951 | 0.062933  | 0.588581  |
| N     | -2.101905 | 3.218342  | 2.598089  |
| N     | -3.591370 | 1.474353  | 2.770332  |
| N     | -1.132794 | 2.677623  | 5.407153  |
| N     | -2.628258 | 0.934138  | 5.581278  |
| N     | 0.962184  | 0.772442  | 4.359559  |
| N     | -0.529676 | -0.968629 | 4.535780  |
| C     | -3.327640 | 2.729708  | 2.408139  |
| H     | -4.113693 | 3.354995  | 1.941647  |
| C     | -2.060332 | 2.020942  | 6.103523  |
| H     | -2.357761 | 2.375657  | 7.109972  |
| C     | 0.696387  | -0.481738 | 4.724950  |
| H     | 1.489113  | -1.116588 | 5.166633  |
| H     | -1.980009 | 4.179686  | 2.260589  |
| H     | -0.231607 | 1.963708  | -4.260049 |
| H     | -0.635913 | -1.951612 | 4.810512  |
| H     | 4.121260  | -2.804832 | -1.680974 |
| H     | 2.343697  | -4.039380 | -2.487918 |
| H     | 2.779876  | -1.395247 | -6.981096 |
| H     | 1.395670  | -3.063841 | -6.176837 |
| H     | -4.546157 | 1.169339  | 2.550878  |
| S     | -0.529861 | -1.931161 | -1.387416 |
| O     | 0.814688  | 0.348984  | -1.429016 |
| C     | 0.013562  | -0.395666 | -0.743669 |
| Mo    | 0.612970  | -2.002222 | -3.589871 |
| Mo    | 1.567794  | -0.084735 | -3.316096 |
| N     | 2.267107  | -3.035166 | -2.685763 |
| N     | 3.268214  | -0.987149 | -2.368819 |
| N     | 1.502926  | -2.273343 | -5.530864 |
| N     | 2.515232  | -0.227741 | -5.231273 |
| N     | -1.106318 | -1.095244 | -4.508416 |
| N     | -0.100264 | 0.948653  | -4.181208 |
| C     | 3.281620  | -2.312387 | -2.210639 |
| H     | 1.936817  | 1.053607  | 4.514327  |
| C     | 2.300404  | -1.306379 | -5.986781 |
| C     | -1.146223 | 0.233698  | -4.602424 |
| H     | -2.041286 | 0.740331  | -5.014607 |
| S     | 0.327709  | 1.490870  | 1.220257  |



|   |           |           |           |
|---|-----------|-----------|-----------|
| S | -1.632207 | -0.811161 | 1.454106  |
| H | 4.068051  | -0.508393 | -1.939493 |
| H | -1.964531 | -1.560641 | -4.824613 |
| H | -3.329660 | 0.494982  | 6.188231  |
| H | 3.139605  | 0.464564  | -5.661067 |

---

**Table S8** Cartesian coordinates (Å) for DFT energy-minimized model compounds of  $[(\text{OO}-\text{OS})]^+$ .

| Atoms | x         | y         | z         |
|-------|-----------|-----------|-----------|
| Mo    | -0.719979 | 1.939104  | 3.372115  |
| Mo    | -1.740234 | 0.036088  | 3.121497  |
| H     | -1.455468 | 3.047318  | 5.942278  |
| C     | -0.185384 | 0.303598  | 0.570349  |
| N     | -2.352977 | 3.005844  | 2.482221  |
| N     | -3.413453 | 0.982940  | 2.185162  |
| N     | -1.591128 | 2.252214  | 5.307005  |
| N     | -2.666272 | 0.235171  | 5.029063  |
| N     | 0.959167  | 0.987585  | 4.309511  |
| N     | -0.108924 | -1.029173 | 3.998851  |
| C     | -3.398602 | 2.309910  | 2.038163  |
| H     | -4.244109 | 2.825948  | 1.544856  |
| C     | -2.415558 | 1.314862  | 5.771659  |
| H     | -2.889686 | 1.427838  | 6.764166  |
| C     | 0.948366  | -0.338321 | 4.433496  |
| H     | 1.810554  | -0.864471 | 4.885429  |
| H     | -2.419619 | 4.016719  | 2.314488  |
| H     | 0.240051  | 2.028104  | -4.447019 |
| H     | -0.027475 | -2.044636 | 4.128294  |
| H     | 3.873277  | -3.014606 | -1.380447 |
| H     | 1.820174  | -3.985613 | -1.809628 |
| H     | 2.241093  | -2.255186 | -6.749910 |
| H     | 0.673570  | -3.448687 | -5.541264 |
| H     | -4.251138 | 0.528407  | 1.803322  |
| O     | -0.245599 | -1.245078 | -1.250743 |
| O     | 1.122413  | 0.538295  | -1.427933 |
| C     | 0.255676  | -0.158226 | -0.776495 |
| Mo    | 0.405392  | -1.875541 | -3.163000 |
| Mo    | 1.730061  | -0.162335 | -3.322099 |
| N     | 1.910279  | -3.032508 | -2.180396 |
| N     | 3.314826  | -1.213497 | -2.348156 |
| N     | 1.001005  | -2.599151 | -5.066342 |
| N     | 2.408138  | -0.781580 | -5.236348 |
| N     | -1.221925 | -0.779636 | -4.008786 |
| N     | 0.184065  | 1.037622  | -4.182162 |
| C     | 3.089592  | -2.460471 | -1.930595 |
| H     | 1.815209  | 1.435033  | 4.657433  |
| C     | 1.907727  | -1.904256 | -5.756771 |
| C     | -1.025906 | 0.498830  | -4.338743 |
| H     | -1.860350 | 1.106608  | -4.735848 |
| S     | 0.419778  | 1.815789  | 1.180082  |
| O     | -1.003193 | -0.436845 | 1.230538  |
| H     | 4.241768  | -0.849044 | -2.098880 |
| H     | -2.184597 | -1.106371 | -4.152952 |
| H     | -3.311586 | -0.434521 | 5.464679  |
| H     | 3.098680  | -0.312870 | -5.835040 |

---

**Table S9** Cartesian coordinates (Å) for DFT energy-minimized model compounds of ([SS-OO])<sup>+</sup>.

| Atoms | x         | y         | z         |
|-------|-----------|-----------|-----------|
| Mo    | -0.750147 | 1.894135  | 3.362416  |
| Mo    | -1.958280 | 0.090679  | 3.426771  |
| H     | -2.000149 | -1.245014 | -4.479031 |
| C     | -0.403195 | 0.266840  | 0.926081  |
| N     | -2.300026 | 2.974141  | 2.361168  |
| N     | -3.581598 | 1.059930  | 2.431701  |
| N     | -1.458464 | 2.518133  | 5.265075  |
| N     | -2.741936 | 0.603695  | 5.334557  |
| N     | 0.920486  | 0.889301  | 4.235215  |
| N     | -0.361136 | -1.024641 | 4.306165  |
| C     | -3.428094 | 2.330727  | 2.055913  |
| H     | -4.229009 | 2.845638  | 1.492436  |
| C     | -2.338325 | 1.742377  | 5.901951  |
| H     | -2.729348 | 2.040606  | 6.891389  |
| C     | 0.802360  | -0.408481 | 4.521358  |
| H     | 1.663730  | -0.969579 | 4.929755  |
| H     | -2.261803 | 3.939992  | 2.015272  |
| H     | 0.226467  | 2.041668  | -4.599146 |
| H     | -4.472564 | 0.640530  | 2.141044  |
| H     | 4.179690  | -2.932751 | -1.787550 |
| H     | 1.854109  | 1.276417  | 4.416278  |
| H     | -1.207888 | 3.373631  | 5.775187  |
| H     | -3.420094 | 0.073860  | 5.895196  |
| H     | 2.472405  | -1.958302 | -6.887874 |
| H     | 4.382756  | -0.688787 | -2.301227 |
| H     | -0.356930 | -2.023479 | 4.543917  |
| H     | 0.962789  | -3.297655 | -5.762351 |
| S     | -0.486451 | -1.589610 | -1.094195 |
| S     | 1.225585  | 0.934862  | -1.180135 |
| C     | 0.097584  | -0.118356 | -0.409368 |
| Mo    | 0.557758  | -1.846564 | -3.292787 |
| Mo    | 1.776906  | -0.047629 | -3.354381 |
| N     | 2.169527  | -2.985515 | -2.453933 |
| N     | 3.459545  | -1.080590 | -2.520166 |
| N     | 1.232956  | -2.452645 | -5.245999 |
| N     | 2.526903  | -0.547336 | -5.311914 |
| N     | -1.082935 | -0.848299 | -4.244134 |
| N     | 0.206959  | 1.056510  | -4.311548 |
| C     | 3.331787  | -2.374140 | -2.226524 |
| H     | 2.156696  | -3.976114 | -2.184994 |
| C     | 2.103212  | -1.672705 | -5.885123 |
| H     | 3.197345  | -0.011976 | -5.875469 |
| C     | -0.939270 | 0.432850  | -4.581883 |
| H     | -1.768819 | 0.976553  | -5.072031 |
| O     | 0.007531  | 1.371099  | 1.467936  |
| O     | -1.249930 | -0.504606 | 1.535483  |

**Table S10** Cartesian coordinates (Å) for DFT energy-minimized model compounds of ([SS-OS])<sup>+</sup>.

| Atoms | x         | y         | z         |
|-------|-----------|-----------|-----------|
| Mo    | -0.777615 | 2.121469  | 3.603165  |
| Mo    | -1.756061 | 0.195723  | 3.330193  |
| H     | -1.965091 | -1.109438 | -4.497964 |
| C     | -0.159394 | 0.490242  | 0.792007  |
| N     | -2.424132 | 3.156646  | 2.699564  |
| N     | -3.433592 | 1.111629  | 2.373335  |
| N     | -1.689071 | 2.411804  | 5.528286  |
| N     | -2.717541 | 0.372337  | 5.224713  |
| N     | 0.898171  | 1.200620  | 4.578763  |
| N     | -0.121408 | -0.836646 | 4.236566  |
| C     | -3.444283 | 2.439340  | 2.232381  |
| H     | -4.290559 | 2.938594  | 1.723543  |
| C     | -2.499933 | 1.454550  | 5.974744  |
| H     | -2.991688 | 1.552584  | 6.960258  |
| C     | 0.913062  | -0.125453 | 4.693200  |
| H     | 1.779053  | -0.636443 | 5.154904  |
| H     | -2.508226 | 4.166350  | 2.532472  |
| H     | 0.468770  | 2.014044  | -4.806777 |
| H     | -4.251112 | 0.640114  | 1.968973  |
| H     | 4.156373  | -3.100138 | -1.885804 |
| H     | 1.739694  | 1.663989  | 4.940962  |
| H     | -1.580174 | 3.205750  | 6.170224  |
| H     | -3.354874 | -0.312274 | 5.648772  |
| H     | 2.383572  | -2.215842 | -6.981987 |
| H     | 4.492553  | -0.896228 | -2.492946 |
| H     | -0.017731 | -1.851435 | 4.355325  |
| H     | 0.821426  | -3.407873 | -5.767154 |
| S     | -0.386401 | -1.429841 | -1.138144 |
| S     | 1.472401  | 0.977686  | -1.383843 |
| C     | 0.296810  | 0.040384  | -0.525045 |
| Mo    | 0.575932  | -1.836602 | -3.349346 |
| Mo    | 1.910120  | -0.125084 | -3.514901 |
| N     | 2.132291  | -3.047129 | -2.507215 |
| N     | 3.541921  | -1.235711 | -2.679605 |
| N     | 1.158856  | -2.563000 | -5.292217 |
| N     | 2.573064  | -0.751766 | -5.466927 |
| N     | -1.016970 | -0.767427 | -4.303352 |
| N     | 0.393498  | 1.042038  | -4.485504 |
| C     | 3.336945  | -2.504937 | -2.330178 |
| H     | 2.061756  | -4.023553 | -2.198381 |
| C     | 2.060753  | -1.867866 | -5.983062 |
| H     | 3.260170  | -0.283268 | -6.068781 |
| C     | -0.798613 | 0.487497  | -4.697228 |
| H     | -1.605097 | 1.066988  | -5.184333 |
| S     | 0.394864  | 2.028034  | 1.446044  |
| O     | -0.977984 | -0.250057 | 1.461903  |
